# Supplementary material
Source: PubMed Central journal article supplement (PMC5675810)
Supplement: NIHMS897627-supplement-Impact_Inventory.pdf [file NIHMS897627-supplement-Impact_Inventory.pdf]

# Impact Inventory

## Walensky 2017

| Sector                                                           | Type of Impact<br>(list category within each sector with unit of measure if relevant) <sup>a</sup> | Included in This Reference Case Analysis From...Perspective? |                                     | Notes on Sources of Evidence     |
|------------------------------------------------------------------|----------------------------------------------------------------------------------------------------|--------------------------------------------------------------|-------------------------------------|----------------------------------|
|                                                                  |                                                                                                    | Health Care Sector                                           | Societal                            |                                  |
| <b>Formal Health Care Sector</b>                                 |                                                                                                    |                                                              |                                     |                                  |
| Health                                                           | Health outcomes (effects)                                                                          |                                                              |                                     | See Table 1 for all data sources |
|                                                                  | Longevity effects                                                                                  | <input type="checkbox"/>                                     | <input checked="" type="checkbox"/> |                                  |
|                                                                  | Health-related quality-of-life effects                                                             | <input type="checkbox"/>                                     | <input type="checkbox"/>            |                                  |
|                                                                  | Other health effects (eg, adverse events and secondary transmissions of infections)                | <input type="checkbox"/>                                     | <input checked="" type="checkbox"/> |                                  |
|                                                                  | Medical costs                                                                                      |                                                              |                                     |                                  |
|                                                                  | Paid for by third-party payers                                                                     | <input type="checkbox"/>                                     | <input checked="" type="checkbox"/> |                                  |
|                                                                  | Paid for by patients out-of-pocket                                                                 | <input type="checkbox"/>                                     | <input type="checkbox"/>            |                                  |
| Future related medical costs (payers and patients)               | <input type="checkbox"/>                                                                           | <input checked="" type="checkbox"/>                          |                                     |                                  |
| Future unrelated medical costs (payers and patients)             | <input type="checkbox"/>                                                                           | <input type="checkbox"/>                                     |                                     |                                  |
| <b>Informal Health Care Sector</b>                               |                                                                                                    |                                                              |                                     |                                  |
| Health                                                           | Patient-time costs                                                                                 | NA                                                           | <input type="checkbox"/>            |                                  |
|                                                                  | Unpaid caregiver-time costs                                                                        | NA                                                           | <input type="checkbox"/>            |                                  |
|                                                                  | Transportation costs                                                                               | NA                                                           | <input type="checkbox"/>            |                                  |
| <b>Non-Health Care Sectors (with examples of possible items)</b> |                                                                                                    |                                                              |                                     |                                  |
| Productivity                                                     | Labor market earnings lost                                                                         | NA                                                           | <input type="checkbox"/>            |                                  |
|                                                                  | Cost of unpaid lost productivity due to illness                                                    | NA                                                           | <input type="checkbox"/>            |                                  |
|                                                                  | Cost of uncompensated household production <sup>b</sup>                                            | NA                                                           | <input type="checkbox"/>            |                                  |
| Consumption                                                      | Future consumption unrelated to health                                                             | NA                                                           | <input type="checkbox"/>            |                                  |
| Social Services                                                  | Cost of social services as part of intervention                                                    | NA                                                           | <input type="checkbox"/>            |                                  |
| Legal or Criminal Justice                                        | Number of crimes related to intervention                                                           | NA                                                           | <input type="checkbox"/>            |                                  |
|                                                                  | Cost of crimes related to intervention                                                             | NA                                                           | <input type="checkbox"/>            |                                  |
| Education                                                        | Impact of intervention on educational achievement of population                                    | NA                                                           | <input type="checkbox"/>            |                                  |
| Housing                                                          | Cost of intervention on home improvements (eg, removing lead paint)                                | NA                                                           | <input type="checkbox"/>            |                                  |
| Environment                                                      | Production of toxic waste pollution by intervention                                                | NA                                                           | <input type="checkbox"/>            |                                  |
| Other (specify)                                                  | Other impacts                                                                                      | NA                                                           | <input type="checkbox"/>            |                                  |
